# Supplementary material for: Kinesin-5 inhibitor resistance is driven by kinesin-12
Source: PubMed Central journal article supplement — J Cell Biol. 2016 Apr 25;213(2):213–27. doi: 10.1083/jcb.201507036 (PMC5084272; doi:10.1083/jcb.201507036), 2016-04-25
Supplement: JCB_201507036_sm.pdf [file JCB_201507036_sm.pdf]

Sturgill et al., <http://www.jcb.org/cgi/content/full/jcb.201507036/DC1>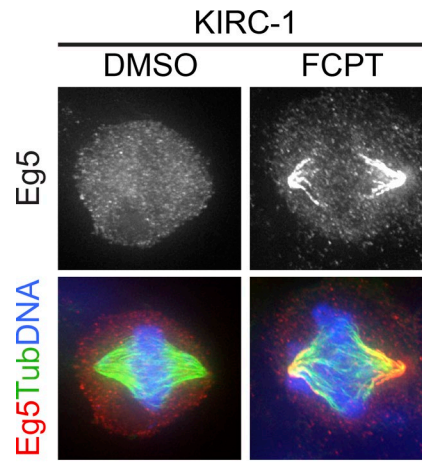

Figure S1. **The Eg5 mechanochemical state induced by rigor is dominant to the effects of STLC.** Maximum intensity z-projections of KIRC-1 cells treated with DMSO or FCPT and stained with antibodies targeting Eg5 (grayscale as individual and red in merge) and tubulin (green). DNA, blue. LUTs for gray-scale and red channels are scaled identically. Bar, 10  $\mu$ m.

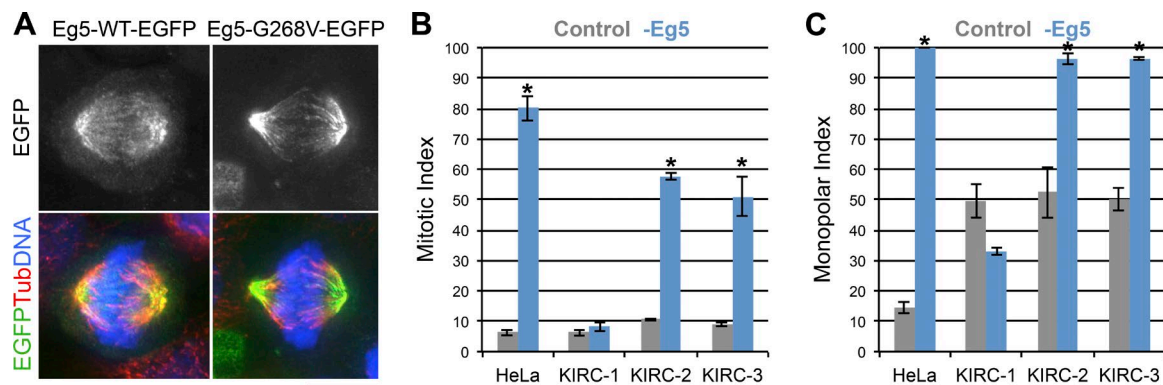

Figure S2. **Exogenous expression of Eg5-G268V-EGFP in mitotic cells and quantitation of the MI and MPI in Eg5-depleted cells.** (A) Exogenous Eg5-G268V-EGFP induces spindle MT bundling. Maximum intensity z-projections of mitotic HeLa cells expressing Eg5-WT-EGFP or Eg5-G268V-EGFP (grayscale and green) and stained with antibodies targeting tubulin (red). LUTs for individual channels are scaled identically. Bar, 10  $\mu$ m. (B) Eg5 depletion induces a mitotic arrest in KIRC-2 and -3. Values represent the mean MI of indicated cell types 1 d after transfection with nontargeting (gray) or Eg5-targeting (blue) siRNAs. Error bars,  $\pm$  SEM;  $n \geq 345$  cells from three independent experiments; \*,  $P \leq 0.03$  relative to control. (C) Eg5 depletion prevents spindle assembly in KIRC-2 and -3. Values represent the mean MPI of indicated cell types 1 d after transfection with nontargeting (gray) or Eg5-targeting (blue) siRNAs. Error bars,  $\pm$  SEM;  $n = 300$  cells from three independent experiments; \*,  $P \leq 0.03$  relative to control.

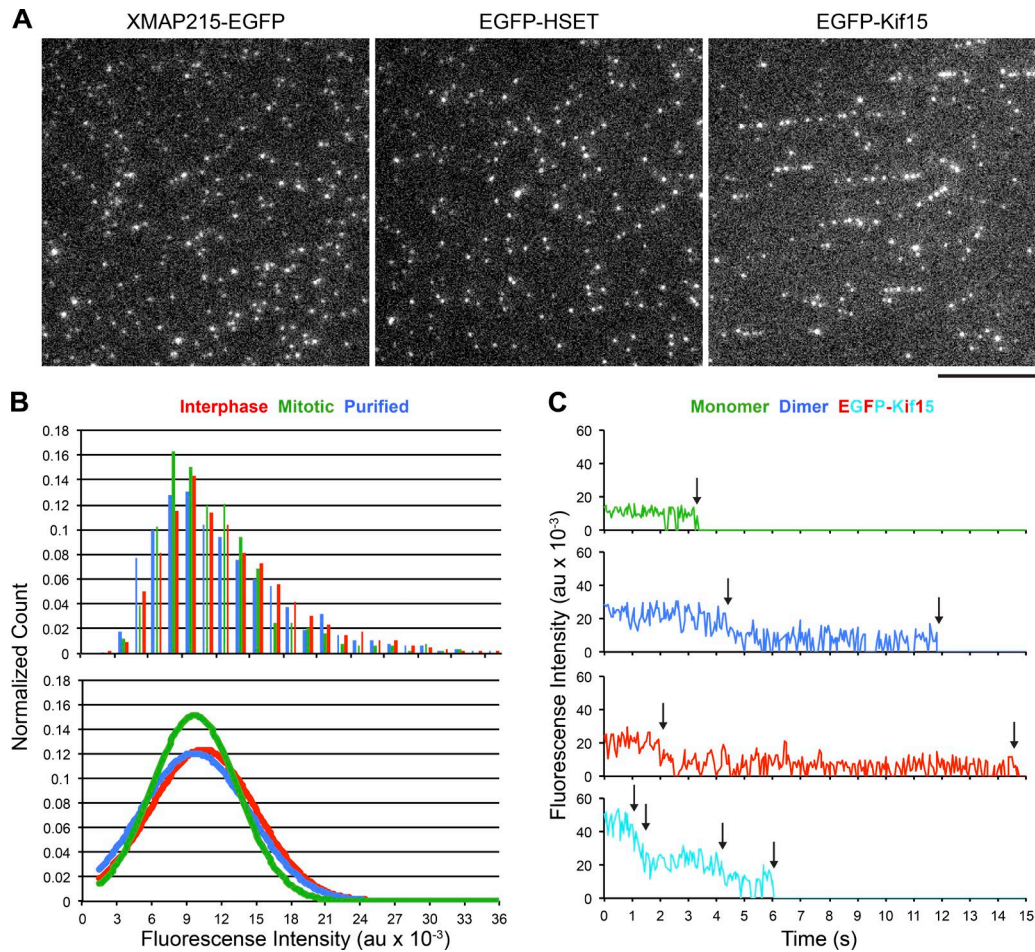

Figure S3. **Representative fields of view from single-molecule imaging experiments and initial fluorescence intensities of EGFP-Kif15 from interphase and mitotic cell extracts.** (A) Initial frames from time-lapse photobleaching experiments showing flow cells infused with XMAP215-EGFP, EGFP-HSET, or EGFP-Kif15 as indicated. XMAP215-EGFP and EGFP-HSET were nonspecifically bound, whereas EGFP-Kif15 molecules were bound to surface-bound MTs with AMPPNP. Bar, 10  $\mu$ m. (B) Cellular Kif15 primarily organizes into dimers regardless of cell cycle state. (top) Histogram showing initial fluorescence intensities of EGFP-Kif15 from interphase HeLa cell extracts (red,  $10,801 \pm 282$  au, mean  $\pm$  95% COI) and mitotic HeLa cell extracts (green,  $9,673 \pm 428$  au, mean  $\pm$  95% COI). Purified EGFP-Kif15 (blue,  $10,334 \pm 282$  au, mean  $\pm$  95% COI) is also shown. Counts are normalized to 1.  $n = 1,985$  (interphase), 482 (mitotic), and 1,652 (purified) particles from  $\geq 9$  fields of view. (bottom) Single Gaussian fits of fluorescence intensity distributions shown above. Interphase (red,  $R^2 = 0.92$ ), mitotic (green,  $R^2 = 0.94$ ), and purified (blue,  $R^2 = 0.90$ ). Fluorescence intensities are indicated in au  $\times 10^{-3}$ . (C) Traces from Fig. 3 E displayed on separate plots. XMAP215-EGFP (green) represents monomer control. EGFP-HSET (blue) represents dimer control. Two example traces are shown for EGFP-Kif15 (red and cyan). Arrows denote probable photobleaching steps. Fluorescence intensities are indicated in au  $\times 10^{-3}$ , and the baseline is set to the background fluorescence.

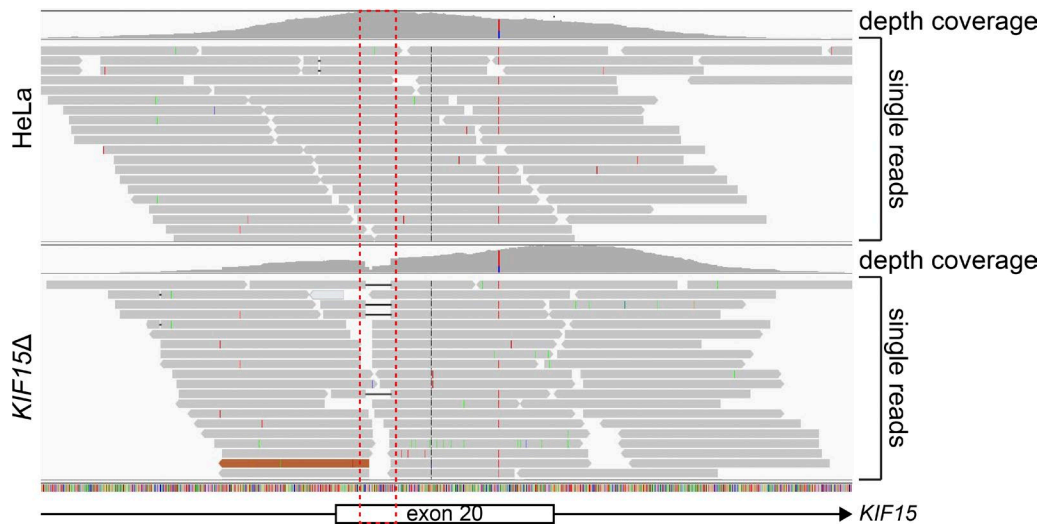

Figure S4. **Integrative Genomics Viewer showing disruption of *KIF15* exon 20 in the *KIF15Δ* line.** Depth coverage and single reads from WES of HeLa (top) and *KIF15Δ* (bottom) genomic DNA around *KIF15* exon 20. The red stippled box highlights the area of CRISPR-mediated genomic alteration in the *KIF15Δ* line, appearing as a decrease in depth coverage and gaps in the single reads.

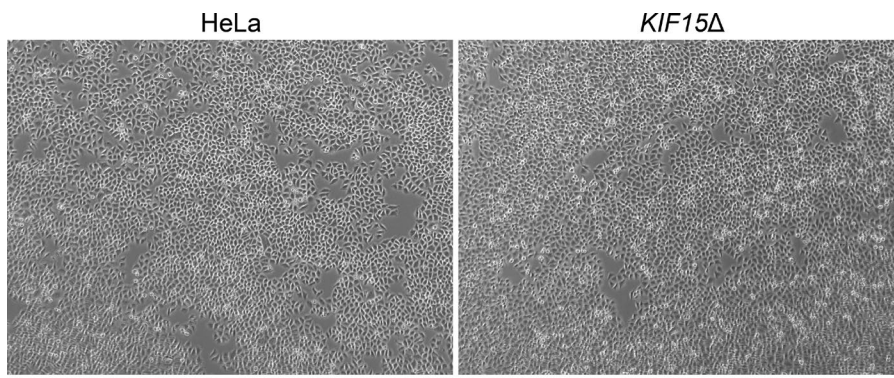

Figure S5. **Plating of HeLa and *KIF15Δ* cells for long-term K51-resistance experiments.** Bright-field images of HeLa and *KIF15Δ* cells 1 d after plating at  $6.8 \pm 10^6$  cells per 10-cm dish. Bar, 500  $\mu$ m.

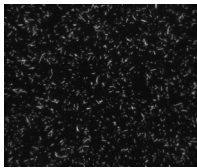

Video 1. **Time-lapse imaging of X-rhodamine-labeled MT gliding powered by Eg5-WT.** Acquisition at 5-s intervals, with playback at five frames per second.

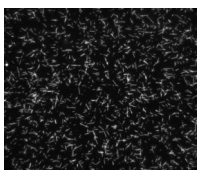

Video 2. **Time-lapse imaging of X-rhodamine-labeled MT gliding powered by Eg5-G268V.** Acquisition at 5-s intervals, with playback at five frames per second.
